# Supplementary material for: Monoclonal Antibodies in Preclinical EAE Models of Multiple Sclerosis: A Systematic Review
Source: Int J Mol Sci. 2017 Sep 16;18(9):1992. doi: 10.3390/ijms18091992 (PMC5618641; doi:10.3390/ijms18091992)
Supplement: Supplementary file 1 [file ijms-18-01992-s001.xlsx]

## Sheet: mABs effect studies
Target	Target gene name	Alternative gene symbol	Species	Strain	Sex & Age	EAE model	Immunization	Treatment schedule	Regimen	Route of administration	Single dose (mg/kg) estimate	Total dose (ca. mg/kg)	Number doses	Clinical effects	Therapeutic effect size estimate (EAE score reduction)	Therapeutic effect size score (6 strong, 0 no, -2 worse)	Weighted Effec size (based on n)	lower n number	higher n number	Statistics used to assess clinical effects (scores)	Study design	Reference	Year of publication	Journal
IFNγ	Ifng	Ifng	Rat	Lewis	male 3-4 wks	Monophasic acute EAE	Guinea pig MBP/CFA	day 0-14, three times per week	preventive	I.p.	3.33	20	6	Reduced EAE scores	Minor (ca. 10%)	1	1	10	10	no statistic	early vs. late	Voorthuis et al. (1990)	1990	Clin Exp Immunol
IFNγ	Ifng	Ifng	Rat	Lewis	male 3-4 wks	Monophasic acute EAE	Guinea pig MBP/CFA	day 8-22, twice per week	pre-onset	I.p.	3.33	20	6	Aggravated EAE scores	Worse	-2	-2	10	10	no statistic	early vs. late	Voorthuis et al. (1990)	1990	Clin Exp Immunol
BP/Ha-complex	Mbp	Mbp	Mouse	SJL/J		RR-EAE	Mouse SC/CFA	day -2-3, 5, 7, 9	pre-immun	I.p.	16	144	9	delayed EAE onset, reduced EAE scores	Mild (ca. 25%)	2	2.4	10	12	no statistic	different mAb clones	Aharoni et al. (1991)	1991	Nature
BP/Ia-complex	Mbp	Mbp	Mouse	SJL/J		RR-EAE	Mouse SC/CFA	day -2-3, 5, 7, 9	pre-immun	I.p.	16	144	9	delayed EAE onset, reduced EAE scores	Strong (ca. 75%)	5	6	10	12	no statistic	different mAb clones	Aharoni et al. (1991)	1991	Nature
BP/Ia-complex	Mbp	Mbp	Mouse	SJL/J		RR-EAE	Mouse SC/CFA	day -2-3, 5, 7, 9	pre-immun	I.p.	16	144	9	delayed EAE onset, reduced EAE scores	Strong (ca. 75%)	5	6	10	12	no statistic	different mAb clones	Aharoni et al. (1991)	1991	Nature
BP/Ia-complex	Mbp	Mbp	Mouse	SJL/J		RR-EAE	Mouse SC/CFA	day -2-3, 5, 7, 9	pre-immun	I.p.	16	144	9	delayed EAE onset, reduced EAE scores	Very strong (ca. 95%)	6	7.2	10	12	no statistic	different mAb clones	Aharoni et al. (1991)	1991	Nature
Cd45	Cd45	PTPRC	Rat	Lewis		Monophasic acute EAE	Adoptive transferCd4 T-cell clone directed against myelin	day 2	preOnset_adopT	I.p.	3.33333	3.33333	1	No difference	No effect	0	0	5	6	χ2 test	different targets	Yednock et al. (1992)	1992	Natute
VLA-4	Itga4	Itga4	Rat	Lewis		Monophasic acute EAE	Adoptive transfer Cd4 T-cell clone directed against myelin	day 2	preOnset_adopT	I.p.	5.33333	5.3	0.99375	Reduced EAE incidence	Strong (ca. 80%)	5	3	5	6	χ2 test	different targets	Yednock et al. (1992)	1992	Natute
Thy1.1 (Cd90)	Thy1	Thy1	Rat	Lewis		Monophasic acute EAE	Adoptive transfer Cd4 T-cell clone directed against myelin	day 2	preOnset_adopT	I.p.	3.33333	3.33333	1	No difference	No effect	0	0	5	6	χ2 test	different targets	Yednock et al. (1992)	1992	Natute
CR3	C3	C3	Rat	Lewis	female	Monophasic acute EAE	Guinea pig spinal cord/CFA	day 7-11, every other day	pre-onset	I.v.	6.7	20	3	Reduced EAE scores	Mild (ca. 25%)	2	1.4	4	7	no statistic	different mAb clones	Huitinga et al. (1993)	1993	J Immunol
CR3	C3	C3	Rat	Lewis	female	Monophasic acute EAE	Guinea pig spinal cord/CFA	day 7-11, every other day	pre-onset	I.v.	6.7	20	3	Reduced EAE scores	Strong (ca. 75%)	5	6	8	12	no statistic	different mAb clones	Huitinga et al. (1993)	1993	J Immunol
CR3	C3	C3	Rat	Lewis	female	Monophasic acute EAE	Guinea pig spinal cord/CFA	day 7-11, every other day	pre-onset	I.v.	6.7	20	3	Reduced EAE scores	Strong (ca. 75%)	5	4	8	8	no statistic	different mAb clones	Huitinga et al. (1993)	1993	J Immunol
ICAM1	Cd54	Icam1	Mouse	SJL/J	female 6-10 wks	RR-EAE	MBP/CFA	day 1-14, daily	preventive	I.p.	4	56	14	No difference	No effect	0	0	14	14	Wilcoxon rank sum test	uni-model-dose	Canella e al. (1993)	1993	J Neuroimmunol
TCRαβ	Tcr1, Tcrb	Tcr1, Tcrb	Rat	Lewis	female	Monophasic acute EAE	Guinea pig MBP/CFA	day -6+ -2, twice daily	pre-immun	I.p.	1.66	6.6	4	Reduced EAE scores	Very strong (ca. 95%)	6	3	5	5	no statistic	Early vs. late, short vs. long	Matsumoto et al. (1994)	1994	Immunology
TCRαβ	Tcr1, Tcrb	Tcr1, Tcrb	Rat	Lewis	female	Monophasic acute EAE	Guinea pig MBP/CFA	day -7- -1, daily	pre-immun	I.p.	1.66	11.6	7	Prevention of EAE incidence	Very strong (100%)	6	2.4	4	4	no statistic	Early vs. late, short vs. long	Matsumoto et al. (1994)	1994	Immunology
TCRαβ	Tcr1, Tcrb	Tcr1, Tcrb	Rat	Lewis	female	Monophasic acute EAE	Guinea pig MBP/CFA	day 11-17, daily	onset	I.p.	1.66	11.6	7	Reduced EAE scores	Mild (ca. 25%)	2	1	5	5	no statistic	Early vs. late, short vs. long	Matsumoto et al. (1994)	1994	Immunology
TCRαβ	Tcr1, Tcrb	Tcr1, Tcrb	Rat	Lewis	female	Monophasic acute EAE	Guinea pig MBP/CFA	day 10-16, daily	onset	I.p.	1.66	11.6	7	Prevention of EAE incidence	Very strong (100%)	6	3	5	5	no statistic	Early vs. late, short vs. long	Matsumoto et al. (1994)	1994	Immunology
TNFα/β	TNF	Tnf	Mouse	ABH Biozzi		CR-EAE	Mouse SC/CFA	day 10-12, daily	onset	I.p.	10	30	3	Reduced EAE scores	Substantial (ca. 50%)	4	2.8	5	7	Wilcoxon rank sum test	dose response	Baker et al. (1994)	1994	J Immunol
TNFα/β	TNF	Tnf	Mouse	ABH Biozzi		CR-EAE	Mouse SC/CFA	day 10-12, daily	onset	I.p.	40	120	3	Reduced EAE scores	Moderate (ca. 40%)	3	2.1	5	7	Wilcoxon rank sum test	dose response	Baker et al. (1994)	1994	J Immunol
LFA-1	Cd11a	Itgal	Mouse	SJL/J	female 6 wks	RR-EAE	Adoptive transfer encephalitogenic T cells	day 0-6, every other day	preOnset_adopT	I.p.	2	8	4	delayed EAE onset, reduced EAE scores, reduced relapse rate	Substantial (ca. 50%)	4	2.4	6	6	no statistic	different targets, short vs. Long	Gordon et al. (1995)	1995	J Neuroimmunol
LFA-1	Cd11a	Itgal	Mouse	SJL/J	female 6 wks	RR-EAE	Adoptive transfer encephalitogenic T cells	day 4-10, every other day	Onset-adopT	I.p.	2	8	4	delayed EAE onset	Substantial (ca. 50%)	4	2.4	6	6	no statistic	different targets, short vs. Long	Gordon et al. (1995)	1995	J Neuroimmunol
LFA-1	Cd11a	Itgal	Mouse	SJL/J	female 6 wks	RR-EAE	Adoptive transfer encephalitogenic T cells	day 8-14, daily	Onset-adopT	I.p.	2	14	4	Reduced EAE scores	Strong (ca. 75%)	5	2	4	4	no statistic	different targets, short vs. Long	Gordon et al. (1995)	1995	J Neuroimmunol
LFA-1	Cd11a	Itgal	Mouse	SJL/J	female 6 wks	RR-EAE	Adoptive transfer encephalitogenic T cells	day 0-14, every other day	preOnset_adopT	I.p.	2	16	8	Prevention of EAE incidence	Very strong (100%)	6	2.4	4	4	no statistic	different targets, short vs. Long	Gordon et al. (1995)	1995	J Neuroimmunol
LFA-1	Cd11a	Itgal	Rat	Lewis	male 8-12 wks	Monophasic acute EAE	Adoptive transfer encephalitogenic T cells	day 0-9, daily	preOnset_adopT	I.p.	3.3	33	10	No difference	No effect	0	0	0	0	Student's t test	different targets	Kobayashi e al. (1995)	1995	Cell Immunol
MAC-1	Cd11b	Itgam	Mouse	SJL/J	female 6 wks	RR-EAE	Adoptive transfer encephalitogenic T cells	day 0-6, every other day	preOnset_adopT	I.p.	2	8	4	Reduced EAE scores	Substantial (ca. 50%)	4	2	5	5	no statistic	different targets, short vs. Long	Gordon et al. (1995)	1995	J Neuroimmunol
MAC-1	Cd11b	Itgam	Mouse	SJL/J	female 6 wks	RR-EAE	Adoptive transfer encephalitogenic T cells	day 0-14, every other day	preOnset_adopT	I.p.	2	16	8	delayed EAE onset, reduced EAE scores	Substantial (ca. 50%)	4	2	5	5	no statistic	different targets, short vs. Long	Gordon et al. (1995)	1995	J Neuroimmunol
MAC-1	Cd11b	Itgam	Mouse	SJL/J	female 6 wks	RR-EAE	Adoptive transfer encephalitogenic T cells	day 0-22, every other day	preOnset_adopT	I.p.	2	24	12	delayed EAE onset	Moderate (ca. 40%)	3	1.5	5	5	no statistic	different targets, short vs. Long	Gordon et al. (1995)	1995	J Neuroimmunol
MAC-1	Cd11b	Itgam	Mouse	SJL/J	female 6 wks	RR-EAE	Adoptive transfer encephalitogenic T cells	day 8-22, daily	Onset-adopT	I.p.	2	30	8	Reduced EAE scores	Strong (ca. 75%)	5	2.5	5	5	no statistic	different targets, short vs. Long	Gordon et al. (1995)	1995	J Neuroimmunol
Cd2	Cd2	Cd2	Rat	Lewis	female and male 6-8 wks	Monophasic acute EAE	MBP/CFA	day -2 or 2 or 4	preventive	I.v.	5	5	1	Reduced EAE scores	Very strong (ca. 90%)	6	3.6	6	6	no statistic	different EAE-models, early versus late	Jung et al.. (1995)	1995	Eur J Immunol
Cd2	Cd2	Cd2	Rat	Lewis	female and male 6-8 wks	Monophasic acute EAE	Adoptive transfer	day 0, 4	preOnset_adopT	I.v.	5	10	2	Reduced EAE scores	Very strong (ca. 90%)	6	3.6	6	6	no statistic	different EAE-models, early versus late	Jung et al.. (1995)	1995	Eur J Immunol
Cd2	Cd2	Cd2	Rat	Lewis	female and male 6-8 wks	Monophasic acute EAE	MBP/CFA	day 12 & 14	onset	I.v.	5	10	2	Reduced EAE scores	Very strong (ca. 90%)	6	3.6	6	6	no statistic	different EAE-models, early versus late	Jung et al.. (1995)	1995	Eur J Immunol
ICAM1	Cd54	Icam1	Rat	Lewis	male 8-12 wks	Monophasic acute EAE	Adoptive transfer encephalitogenic T cells	day 0-9, daily	preOnset_adopT	I.p.	3.3	33	10	delayed EAE onset, reduced EAE scores	Minor (ca. 10%)	1	1	0	0	Student's t test	different targets	Kobayashi e al. (1995)	1995	Cell Immunol
B7-1	Cd80	Cd80	Mouse	SJL/J	female 4-8 wks	RR-EAE	PLP/CFA	day 0-20, every other day	preventive	I.p.	4	44	11	delayed EAE onset, reduced EAE scores	Moderate (ca. 40%)	3	3	10	10	no statistic	different targets, short vs. long	Kuchroo et al. (1995)	1995	Cell
B7-1	Cd80	Cd80	Mouse	SJL/J	female 4-8 wks	RR-EAE	PLP/CFA	day 0-30, every other day	preventive	I.p.	4	64	16	delayed EAE onset, reduced EAE scores	Substantial (ca. 50%)	4	4	5	10	no statistic	different targets, short vs. long	Kuchroo et al. (1995)	1995	Cell
B7-2	Cd86	Cd86	Mouse	SJL/J	female 4-8 wks	RR-EAE	PLP/CFA	day 0-20, every other day	preventive	I.p.	4	44	11	Aggravated EAE scores	Worse	-2	-2	10	10	no statistic	different targets, short vs. long	Kuchroo et al. (1995)	1995	Cell
B7-2	Cd86	Cd86	Mouse	SJL/J	female 4-8 wks	RR-EAE	PLP/CFA	day 0-30, every other day	preventive	I.p.	4	64	16	Aggravated EAE scores	Worse	-2	-2	5	10	no statistic	different targets, short vs. long	Kuchroo et al. (1995)	1995	Cell
IL12	Il12	Il12a	Mouse	SJL/J	female 7-10 wks	RR-EAE	Adoptive transfer	day 1-6 or 1-12, every other day	preOnset_adopT	?	8	48	6	delayed EAE onset, reduced EAE scores	Strong (ca. 75%)	5	3.5	5	7	no statistic	uni-model-dose	Leonard et al. (1995)	1995	J Exp Med
VLA-4	Itga4, Itgb1 dimer	Itga4	Guinea pig	Hartley		PP-EAE	Guinea pig spinal cord/CFA	day 5+9	pre-onset	S.c.	6	12	2	Reduced EAE scores	Mild (ca. 25%)	2	2	0	0	Mann-Whitney U	Short vs long	Kent et al. (1995b)	1995	J Neuroimmunol
VLA-4	Itga4, Itgb1 dimer	Itga4	Guinea pig	Hartley		PP-EAE	Guinea pig spinal cord/CFA	day 12-18, every 3rd day	post-onset	S.c.	6	18	3	Reduced EAE scores	Substantial (ca. 50%)	4	3.2	8	8	Mann-Whitney U	uni-model-dose	Kent et al. (1995)	1995	J Magn reson Imaging
VLA-4	Itga4, Itgb1 dimer	Itga4	Guinea pig	Hartley		PP-EAE	Guinea pig spinal cord/CFA	day 5-15, every 3rd day	pre-onset	S.c.	6	24	4	Reduced EAE scores	Moderate (ca. 40%)	3	3	0	0	Mann-Whitney U	Short vs long	Kent et al. (1995b)	1995	J Neuroimmunol
TCRVβ8.2	Tcrb	Tcrb	Rat	Lewis	7 wks	Monophasic acute EAE	Guinea pig spinal cord/CFA	day 12	onset	I.p.	0.33	0.33	1	Reduced EAE scores	Very strong (ca. 90%)	6	3.6	6	6	Mann-Whitney U	Early vs late, short vs long	Imrich et al. (1995)	1995	J Immunol
TCRVβ8.2	Tcrb	Tcrb	Rat	Lewis	7 wks	Monophasic acute EAE	Guinea pig spinal cord/CFA	day 7, 10, 12	pre-onset	I.p.	0.33	0.99	3	delayed EAE onset, reduced EAE scores	Very strong (ca. 90%)	6	3.6	6	6	Mann-Whitney U	Early vs late, short vs long	Imrich et al. (1995)	1995	J Immunol
LFA-1	Cd11a	Itgal	Rat	Lewis	male 8-12 wks	Monophasic acute EAE	Adoptive transfer encephalitogenic T cells	day 0-6, every other day	preOnset_adopT	I.c.	0.5	2	4	Reduced EAE scores	Moderate (ca. 40%)	3	1.8	6	6	Mann-Whitney U	different targets	Kawai et al. (1996)	1996	Cell Immunol
ICAM1	Cd54	Icam1	Rat	Lewis	male 8-12 wks	Monophasic acute EAE	Adoptive transfer encephalitogenic T cells	day 0-6, every other day	preOnset_adopT	I.c.	0.5	2	4	Reduced EAE scores	Mild (ca. 25%)	2	1.2	6	6	Mann-Whitney U	different targets	Kawai et al. (1996)	1996	Cell Immunol
IFNγ	Ifng	Ifng	Mouse	SJL/J, ABH Biozzi	male and female 8-10 wks;	RR-EAE	Adoptive transfer	day 0+7	preOnset_adopT	I.p.	40	80	2	Increased EAE scores	Worse	-2	-1.4	5	7	Wilcoxon test	uni-model-dose	Heremans et al. (1996)	1996	Eur J Immunol
IL12	Il12	Il12a	Mouse	SJL/J		RR-/SR-EAE	MBP/CFA	day 18-20, daily	post-onset	I.p.	40	120	3	Reduced incidence of relapses, reduced EAE scores	Very strong (ca. 95%)	6	7.2	5	12	χ2 test for relapse incidence	uni-model-dose	Constantinescu et al..(1998)	1996	J Immunol
B7-1	Cd80	Cd80	Mouse	SJL/J		RR-EAE	PLP/CFA	day 21-29, every other day	late	I.p.	2	10	5	Aggravated EAE scores	Worse	-2	-2	10	10	χ2 test and Fisher's exact test	Two mAb clones	Vanderlugt et al. (1997)	1997	J Neuroimmunol
B7-1	Cd80	Cd80	Mouse	SJL/J	female 6-7 wks	RR-EAE	PLP/CFA	day 21-29, every other day	late	I.p.	2	10	5	Aggravated EAE scores	Worse	-2	-2	10	10	χ2 test and Fisher's exact test	Two mAb clones	Vanderlugt et al. (1997)	1997	J Neuroimmunol
Cd40L (Cd154)	Cd40l	CD40LG	Mouse	SJL/J	female 8-12 wks	RR-EAE	PLP/CFA	day 0-4, every other day	preventive	I.p.	10	30	3	Reduced EAE scores	Very strong (ca. 90-100%)	6	2.4	4	4	no statistic	different targets	Laman et al. (1998)	1998	Multiple Sclerosis
Cd40L (Cd154)	Cd40l	CD40LG	Mouse	SJL/J	female 10-12 wks	RR-EAE	MBP/CFA	day 7-21, every other day	pre-onset	I.p.	4	32	8	delayed EAE onset	Moderate	3	5.4	12	18	Mann-Whitney U	Early vs late	Schaub et al. (1998)	1998	J Neuroimmunol
Cd40L (Cd154)	Cd40l	CD40LG	Mouse	SJL/J	female 10-12 wks	RR-EAE	MBP/CFA	day 0-9, daily	preventive	I.p.	4	40	10	No difference	No effect	0	0	12	18	Mann-Whitney U	Early vs late	Schaub et al. (1998)	1998	J Neuroimmunol
Cd44s (pan-specific)	Cd44	Cd44	Mouse	SJL/J	female 8-12 wks	RR-EAE	PLP/CFA	day 0-4, every other day	preventive	I.p.	10	30	3	No difference	No effect	0	0	4	4	no statistic	Two mAb clones	Laman et al. (1998)	1998	Multiple Sclerosis
Cd44v6,v7,v10	Cd44 variants	Cd44	Mouse	SJL/J	female 8-12 wks	RR-EAE	PLP/CFA	day 0-4, every other day	preventive	I.p.	10	30	3	Reduced EAE scores	Moderate (ca. 30-40%)	3	1.2	4	4	no statistic	Two mAb clones	Laman et al. (1998)	1998	Multiple Sclerosis
PGP-1	Abcb1	Abcb1	Mouse	SJL/J	6-8 wks	RR-EAE	Adoptive transfer T cells	day 0+2	preOnset_adopT	?	10	20	2	No difference	No effect	0	0	5	15	no statistic	different targets, dose response	Brocke et al. (1999)	1999	PNAS
PGP-1	Abcb1	Abcb1	Mouse	SJL/J	6-8 wks	RR-EAE	Adoptive transfer T cells	day 0-18, every 3rd day	preOnset_adopT	?	10	70	7	delayed EAE onset, reduced EAE scores	Strong (ca. 75%)	5	7.5	5	15	no statistic	different targets, dose response	Brocke et al. (1999)	1999	PNAS
Cd28	Cd28	Cd28	Mouse	SJL/J X PL/J		RR-EAE	MBP/CFA	day 20-25, daily	late	I.p.	0.4	2.4	6	Reduced EAE scores	Mild (ca. 20%)	2	1.4	6	7	Mann-Whitney U	Early vs late	Perrin et al. (1999)	1999	J Immunol
Cd28	Cd28	Cd28	Mouse	SJL/J X PL/J		RR-EAE	MBP/CFA	day 12-26, every other day	onset	I.p.	0.4	3.2	8	Reduced EAE incidence	Mild (ca. 20%)	2	1.4	6	7	Mann-Whitney U	Early vs late	Perrin et al. (1999)	1999	J Immunol
Cd40L (Cd154)	Cd40l	CD40LG	Mouse	SJL/J	8-12 wks	RR-EAE	Guinea pig spinal cord	day 0	preventive	I.p.	8	8	1	Prevention of EAE incidence	Very strong (ca. 95%)	6	4.2	4	7	χ2 test	uni-model-dose	Constantinescu et al. (1999)	1999	J Neurol Sci
Cd40L (Cd154)	Cd40l	CD40LG	Mouse	SJL/J	female 5-6 wks	RR-EAE	PLP/CFA	day 11-17, every other day	onset	I.p.	8	32	4	Reduced EAE scores	Strong (ca. 80%)	5	5	0	0	Fisher’s exact test	Early vs late	Howard et al. (1999)	1999	J Clin Invest
Cd40L (Cd154)	Cd40l	CD40LG	Mouse	SJL/J	female 5-6 wks	RR-EAE	Adoptive transfer	day 0-21, 3 times per week	preOnset_adopT	I.p.	10	100	10	Reduced EAE scores	Substantial (ca. 50%)	4	4	0	0	Fisher’s exact test	Early vs late	Howard et al. (1999)	1999	J Clin Invest
Cd44	Cd44 variants	Cd44	Mouse	ABH Biozzi		CR-EAE	Mouse SC/CFA	day 16-20, daily	post-onset	I.p.	4	20	5	Reduced EAE scores	Moderate (ca. 40%)	3	4.2	8	14	two-sample test of Wilcoxon	Early vs late, short vs long	Brennan et al. (1999)	1999	Immunology
Cd44	Cd44 variants	Cd44	Mouse	ABH Biozzi		CR-EAE	Mouse SC/CFA	day 12-39, daily	onset	I.p.	4	112	28	Prevention of EAE incidence	Very strong (100%)	6	8.4	8	14	two-sample test of Wilcoxon	Early vs late, short vs long	Brennan et al. (1999)	1999	Immunology
L-selectin	Cd62l	Sell	Mouse	SJL/J	6-8 wks	RR-EAE	Adoptive transfer T cells	day 0-12, every 3rd day	preOnset_adopT	?	10	50	5	delayed EAE onset, reduced EAE scores	Minor (ca. 10%)	1	1.5	5	15	no statistic	different targets, dose response	Brocke et al. (1999)	1999	PNAS
L-selectin	Cd62l	Sell	Mouse	SJL/J	6-8 wks	RR-EAE	Adoptive transfer T cells	day 0-18, every 3rd day	preOnset_adopT	?	10	70	7	No difference	No effect	0	0	5	15	no statistic	different targets, dose response	Brocke et al. (1999)	1999	PNAS
VLA-4	Itga4, Itgb1 dimer	Itga4	Mouse	SJL/J	6-8 wks	RR-EAE	Adoptive transfer T cells	day 0-12, every 3rd day	preOnset_adopT	?	10	50	5	delayed EAE onset, reduced EAE scores	Moderate (ca. 40%)	3	4.5	5	15	no statistic	different targets, dose response	Brocke et al. (1999)	1999	PNAS
VLA-4	Itga4, Itgb1 dimer	Itga4	Mouse	SJL/J	6-8 wks	RR-EAE	Adoptive transfer T cells	day 0-18, every 3rd day	preOnset_adopT	?	10	70	7	Prevention of EAE incidence	Very strong (100%)	6	9	5	15	no statistic	different targets, dose response	Brocke et al. (1999)	1999	PNAS
TCRVβ8.2	Tcrb	Tcrb	Rat	Lewis	male 4-6 wks	Monophasic acute EAE	Adoptive transfer MBP specific T cells	day 8	Late-adopT	I.v.	0.83	0.83	1	delayed EAE onset, reduced EAE scores	Mild (ca. 25%)	2	1.2	6	6	ANOVA	uni-model-dose	Chan et al. (1999)	1999	J Neurosci Res
Cd70	Cd70	TNFSF7	Mouse	SJL/J	female 6-10 wks	RR-EAE	PLP/CFA	day 0-3, daily	preventive	I.p.	10	40	4	Reduced EAE scores	Very strong (ca. 90%)	6	3.6	5	6	Mann-Whitney U	different EAE models, short vs. long	Nakajima et al. (2000)	2000	J Neuroimmunol
Cd70	Cd70	TNFSF7	Mouse	SJL/J	female 6-10 wks	RR-EAE	Adoptive transfer, PLP specific T cells	day 0-14, every other day	preOnset_adopT	I.p.	10	80	8	No difference	No effect	0	0	5	6	Mann-Whitney U	different EAE models, short vs. long	Nakajima et al. (2000)	2000	J Neuroimmunol
Cd152	CTLA4	CTLA4	Mouse	SJL/J	female 6-7 wks	RR-EAE	Adoptive transfer encephalitogenic T cells	day 0-8, every other day	preOnset_adopT	I.p.	2	10	5	delayed EAE onset, reduced EAE scores	Moderate (ca. 40%)	3	1.5	5	5	χ2 test and Fisher's exact test	Early vs late	Karandikar et al. (2000)	2000	J Neuroimmunol
Cd152	CTLA4	CTLA4	Mouse	SJL/J	female 6-7 wks	RR-EAE	PLP/CFA	day 13-21, every other day	post-onset	I.p.	2	10	5	Aggravated EAE scores	Worse	-2	-1.2	6	6	χ2 test and Fisher's exact test	Early vs late	Karandikar et al. (2000)	2000	J Neuroimmunol
IL12	Il12	Il12a	Mouse	NOd/Shi		PP-EAE	MOG/CFA	day 0, 7, 10	preventive	I.p.	20	60	3	delayed EAE onset, reduced EAE scores	Very strong (ca. 90%)	6	7.8	13	13	Mann-Whitney U	uni-model-dose	Ichiwaka e al. (2000)	2000	J Neuroimmunol
VLA-4	Itga4, Itgb1 dimer	Itga4	Mouse	C57Bl/6		PP-EAE	MOG/CFA	day 16-20, every other day	post-onset	I.v (70%)/I.p. (30%)	10	30	3	Reduced EAE scores	Moderate (ca. 40%)	3	1.5	5	5	no statistic	different targets	Kanwar et al. (2000)	2000	J Neuroimmunol
ITGβ7	Itgb7	Itgb7	Mouse	C57Bl/6		PP-EAE	MOG/CFA	day 16-20, every other day	post-onset	I.v (70%)/I.p. (30%)	10	30	3	Reduced EAE scores	Substantial (ca. 50%)	4	2	5	5	no statistic	different targets	Kanwar et al. (2000)	2000	J Neuroimmunol
OX40	Cd134	Tnfrsf4	Mouse	SJL/J	female 6-10 wks	RR-EAE	PLP/CFA	day 0-17, daily	preventive	I.p.	4	72	18	delayed EAE onset, reduced EAE scores	Minor (ca. 10%)	1	1	0	0	Mann-Whitney U	different EAE models, dose-response	Nohara et al. (2001)	2001	J Immunol
OX40	Cd134	Tnfrsf4	Mouse	SJL/J	female 6-10 wks	RR-EAE	PLP/CFA	day 0-17, daily	preventive	I.p.	6	108	18	delayed EAE onset, reduced EAE scores	Minor (ca. 10%)	1	1	0	0	Mann-Whitney U	different EAE models, dose-response	Nohara et al. (2001)	2001	J Immunol
OX40	Cd134	Tnfrsf4	Mouse	SJL/J	female 6-10 wks	RR-EAE	PLP/CFA	day 0-17, daily	preventive	I.p.	10	180	18	delayed EAE onset, reduced EAE scores	Mild (ca. 25%)	2	2	0	0	Mann-Whitney U	different EAE models, dose-response	Nohara et al. (2001)	2001	J Immunol
OX40	Cd134	Tnfrsf4	Mouse	SJL/J	female 6-10 wks	RR-EAE	Adoptive transfer, PLP specific T cells	day -1-10, daily	Pre-adopT	I.p.	16	192	12	Reduced EAE scores	Strong (ca. 75%)	5	5	0	0	Mann-Whitney U	different EAE models, dose-response	Nohara et al. (2001)	2001	J Immunol
OX40	Cd134	Tnfrsf4	Mouse	SJL/J	female 6-10 wks	RR-EAE	PLP/CFA	day 0-17, daily	preventive	I.p.	16	288	18	delayed EAE onset, reduced EAE scores	Substantial (ca. 50%)	4	4	0	0	Mann-Whitney U	different EAE models, dose-response	Nohara et al. (2001)	2001	J Immunol
Cd40	Cd40	Cd40	Monkey	Marmoset		Variable	MOG/CFA	day -1-10, every other day and day 10-50, twice per week	pre-immun	?	5	65	13	Reduced EAE scores, reduced SC demyelination	Very strong (100%)	6	2.4	4	4	no statistic	uni-model-dose	Boon et al. (2001)	2001	J Immunol
Cd40L (Cd154)	Cd40l	CD40LG	Mouse	C57Bl/6		PP-EAE	MOG/CFA	day 0-21, 3 times per week	preventive	I.p.	14	140	10	Reduced EAE incidence	Very strong (100%)	6	5.4	6	9	Student's t test, unpaired	Early vs late	Becher et al. (2001)	2001	J Exp Med
Cd40L (Cd154)	Cd40l	CD40LG	Mouse	C57Bl/6		PP-EAE	MOG/CFA	day13-55, 3 times per week	onset	I.p.	14	210	15	Reduced EAE scores	Strong (ca. 75%)	5	4.5	6	9	Student's t test, unpaired	Early vs late	Becher et al. (2001)	2001	J Exp Med
B7-1	Cd80	Cd80	Rat	Lewis	female	Monophasic acute EAE	Encephalitogenic peptide/CFA	day 0-14, daily	preventive	?	0.33	5	15	No difference	No effect	0	0	10	10	Kruskal-Wallis ANOVA	different targets, dose-response	MacPhee et al. (2001)	2001	J Immunol
B7-1	Cd80	Cd80	Rat	Lewis	female	Monophasic acute EAE	Encephalitogenic peptide/CFA	day 0-14, daily	preventive	?	1.66	25	15	Aggravated EAE scores	Worse	-2	-1	5	5	Kruskal-Wallis ANOVA	different targets, dose-response	MacPhee et al. (2001)	2001	J Immunol
B7-2	Cd86	Cd86	Rat	Lewis	female	Monophasic acute EAE	Encephalitogenic peptide/CFA	day 0-14, daily	preventive	?	0.33	5	15	Aggravated EAE scores	Worse	-2	-2	10	10	Kruskal-Wallis ANOVA	different targets, dose-response	MacPhee et al. (2001)	2001	J Immunol
B7-2	Cd86	Cd86	Rat	Lewis	female	Monophasic acute EAE	Encephalitogenic peptide/CFA	day 0-14, daily	preventive	?	1.66	25	15	No difference	No effect	0	0	5	5	Kruskal-Wallis ANOVA	different targets, dose-response	MacPhee et al. (2001)	2001	J Immunol
VLA-4	Itga4, Itgb1 dimer	Itga4	Mouse	SJL/J	female 6-7 wks	RR-EAE	Adoptive transfer, PLP specific T cells	day 14-32, three times per week	Late-adopT	I.p.	6	54	9	No difference	No effect	0	0	26	26	Student's t test	early vs. late	Theien et al. (2001)	2001	J Clin Invest
VLA-4	Itga4, Itgb1 dimer	Itga4	Mouse	SJL/J	female 6-7 wks	RR-EAE	Adoptive transfer, PLP specific T cells	day 7-25, three times per week	Onset-adopT	I.p.	6	54	9	delayed EAE onset, reduced EAE scores, reduced relapse rate	Strong (ca. 75%)	5	13	26	26	Student's t test	early vs. late	Theien et al. (2001)	2001	J Clin Invest
VLA-4	Itga4, Itgb1 dimer	Itga4	Mouse	SJL/J	female 6-7 wks	RR-EAE	Adoptive transfer, PLP specific T cells	day 24-44, three times per week	Late-adopT	I.p.	6	54	9	Aggravated EAE scores	Worse	-2	-3	15	15	Student's t test	early vs. late	Theien et al. (2001)	2001	J Clin Invest
4-1BB	Cd137	Tnfrsf9	Mouse	C57Bl/6	female 6-10 wks	PP-EAE	MOG/CFA	day 0	preventive	I.p.	6	6	1	Reduced EAE scores	Very strong (ca. 90%)	6	7.2	12	12	Student's t test	different EAE models, dose-response	Sun et al. (2002)	2002	J Immunol
4-1BB	Cd137	Tnfrsf9	Mouse	C57Bl/6	female 6-10 wks	PP-EAE	Adoptive transfer, MOG activated T cells	day 0	preOnset_adopT	I.p.	8	8	1	Aggravated EAE scores	Worse	-2	-0.8	4	4	Student's t test	different EAE models, dose-response	Sun et al. (2002)	2002	J Immunol
4-1BB	Cd137	Tnfrsf9	Mouse	SJL/J	female 6-10 wks	RR-EAE	PLP/CFA	day 0	preventive	I.p.	8	8	1	Reduced EAE scores	Substantial (ca. 50%)	4	2	5	5	Student's t test	different EAE models, dose-response	Sun et al. (2002)	2002	J Immunol
4-1BB	Cd137	Tnfrsf9	Mouse	SJL/J	female 6-10 wks	RR-EAE	PLP/CFA	day 13-34, daily	post-onset	I.p.	8	176	3	Reduced EAE scores	Substantial (ca. 50%)	4	2	5	5	Student's t test	different EAE models, dose-response	Sun et al. (2002)	2002	J Immunol
Cd40	Cd40	Cd40	Monkey	Marmoset	male and female	Variable	Human myelin/CFA	day 14-43,daily	onset	I.v./i.p.	1	30	30	delayed EAE onset	Moderate	3	2.1	7	7	Mann-Whitney U	Early vs late	Laman et al. (2002)	2002	Eur J Immunol
Cd40	Cd40	Cd40	Monkey	Marmoset	male and female	Variable	Human myelin/CFA	day 25-55, daily	late	I.v./i.p.	1	30	30	delayed EAE onset, reduced EAE incidence	Moderate	3	1.5	5	5	Mann-Whitney U	Early vs late	Laman et al. (2002)	2002	Eur J Immunol
Cd40L (Cd154)	Cd40l	CD40LG	Mouse	SJL/J	female 5-6 wks	RR-EAE	PLP/CFA	day 0-6, every other day	preventive	I.p.	8	32	4	Reduced EAE scores	Very strong (ca. 95%)	6	6	0	0	Fisher’s exact test	uni-model-dose	Howard et al. (2002)	2002	J Clin Invest
IP10	Cxcl10	Cxcl10	Rat	Lewis		Monophasic acute EAE	Guinea pig brain homogenate	day 0-8, every other day or day 10, 12, 14	preventive	I.v.	3.33333	16.6667	5	Increased EAE scores	Worse	-1	-0.6	6	6	Repeated measures ANOVA	uni-model-dose	Narumi et al (2002)	2002	Eur J Immunol
IL12p40	Il12b	Il12b	Monkey	Marmoset		Variable	Human myelin/CFA	day 14-80, once per week	onset	I.v.	10	100	10	Reduced EAE incidence	Strong (ca. 80%)	5	2.5	5	5	χ2 test	uni-model-dose	Brok et al. (2002)	2002	J Immunol
SEMA4A	Sema4a	Sema4a	Mouse	C57Bl/6	8-12 wks	PP-EAE	MOG/CFA	day 0-4, daily	preventive	I.v.	4	16	4	Reduced EAE scores	Strong (ca. 80%)	5	5	10	10	no statistic	uni-model-dose	Kumanogoh et al. (2002)	2002	J Immunol
VLA-4	Itga4, Itgb1 dimer	Itga4	Rat	Lewis	female	Monophasic acute EAE	Encephalitogenic peptide/CFA	day 9+13	onset	I.v.	2.5	5	2	delayed EAE onset, reduced EAE scores	Substantial (ca. 50%)	4	5.2	13	13	ANOVA , one-way, Fisher's post hoc	uni-model-dose	Leone et al. (2003)	2003	J Pharmacol Exp Ther
B7S1	Vtcn1	Vtcn1	Mouse	C57Bl/6		PP-EAE	MOG/CFA	day 1, 4, 7	preventive	?	4	12	3	Aggravated EAE scores	Worse	-2	-1	5	5	no statistic	uni-model-dose	durbaka et al. (2003)	2003	Immunity
Cd40L (Cd154)	Cd40l	CD40LG	Mouse	SJL/J	female 10-12 wks	RR-EAE	PLP/CFA	day 0-4, every other day	preventive	I.p.	1	3	3	No difference	No effect	0	0	6	14	ANOVA, LSd post-hoc	dose response	Nagelkerken et al. (2004)	2004	J Immunol
Cd40L (Cd154)	Cd40l	CD40LG	Mouse	SJL/J	female 10-12 wks	RR-EAE	PLP/CFA	day 0-4, every other day	preventive	I.p.	3	9	3	Reduced EAE scores	Very strong (ca. 90%)	6	8.4	6	14	ANOVA, LSd post-hoc	dose response	Nagelkerken et al. (2004)	2004	J Immunol
Cd40L (Cd154)	Cd40l	CD40LG	Mouse	SJL/J	female 10-12 wks	RR-EAE	PLP/CFA	day 0-4, every other day	preventive	I.p.	8	24	3	Prevention of EAE incidence	Very strong (100%)	6	8.4	13	14	ANOVA, LSd post-hoc	dose response	Nagelkerken et al. (2004)	2004	J Immunol
IP10	Cxcl10	Cxcl10	Mouse	129svxC57Bl/6		PP-EAE	MOG/CFA	day 0-14, every other day	preventive	I.p.	4	32	8	Reduced EAE scores	Minor (ca. 10%)	1	1	5	10	Student's t test	different EAE models	Klein et al. (2004)	2004	J Immunol
IP10	Cxcl10	Cxcl10	Mouse	C57Bl/6		PP-EAE	MOG/CFA	day 0-14, every other day	preventive	I.p.	4	32	8	Reduced EAE scores	Mild (ca. 25%)	2	2	5	10	Student's t test	different EAE models	Klein et al. (2004)	2004	J Immunol
IP10	Cxcl10	Cxcl10	Mouse	SJL/J		RR-EAE	MBP/CFA	day 0-14, every other day	preventive	I.p.	4	32	8	Reduced EAE scores	Moderate (ca. 40%)	3	3	5	10	Student's t test	different EAE models	Klein et al. (2004)	2004	J Immunol
Cxcl16	Cxcl16	Cxcl16	Mouse	C57Bl/6	female 6-9 wks	PP-EAE	Adoptive transfer encephalitogenic T cells	day 0, 2	preOnset_adopT	I.p.	20	40	2	delayed EAE onset, reduced EAE scores	Substantial (ca. 50%)	4	2.4	6	6	Mann-Whitney U	different EAE models	Fukumoto et al. (2004)	2004	J Immunol
Cxcl16	Cxcl16	Cxcl16	Mouse	C57Bl/6	female 6-9 wks	PP-EAE	MOG/CFA	day 0, 2, 4, 7	preventive	I.p.	20	80	4	delayed EAE onset, reduced EAE scores	Strong (ca. 75%)	5	3.5	7	7	Mann-Whitney U	different EAE models	Fukumoto et al. (2004)	2004	J Immunol
MAdCAM-1	Madcam1	Madcam1	Mouse	C57Bl/6	8-10 wks	PP-EAE	MOG/CFA	day 35-39, every other day	late	I.v (70%)/I.p. (30%)	20	60	3	Reduced EAE scores	Very strong (100%)	6	3	5	5	ANOVA , one-way, dunnett's post hoc	uni-model-dose	Kanwar et al. (2004)	2004	Brain
ASF	Psmd4	Psmd4	Rat	Lewis	female	Monophasic acute EAE	Adoptive transfer EP-specific T cells	day 0+2	preOnset_adopT	I.v.	3.33	6.66	2	Increased EAE scores	Worse	-1	-0.3	3	3	χ2 test	uni-model-dose	davidson et al. (2004)	2004	J Leukoc Biol
GITR	Tnfrsf18	Tnfrsf18	Mouse	SJL/J	female 5-6 wks	RR-EAE	PLP/CFA	day 0-9, every 3rd day	preventive	I.p.	4	16	4	No difference	No effect	0	0	0	0	Student's t test	dose response	Kohm et al. (2004)	2004	J Immunol
GITR	Tnfrsf18	Tnfrsf18	Mouse	SJL/J	female 5-6 wks	RR-EAE	PLP/CFA	day 0-9, every 3rd day	preventive	I.p.	20	80	4	Aggravated EAE scores	Worse	-2	-2	0	0	Student's t test	dose response	Kohm et al. (2004)	2004	J Immunol
Cd226	Cd226	Cd226	Mouse	SJL/J	female 8-12 wks	RR-EAE	Adoptive transfer PLP specific T cells	day 0-8, every other day	preOnset_adopT	I.p.	4	20	5	delayed EAE onset, reduced EAE scores	Substantial (ca. 50%)	4	2.8	5	7	no statistic	uni-model-dose	Dardalhon et al. (2005)	2005	J Immunol
Cd226	Cd226	Cd226	Mouse	SJL/J	female 8-12 wks	RR-EAE	Adoptive transfer PLP specific T cells	day 0-8, every other day	preOnset_adopT	I.p.	4	20	5	delayed EAE onset, reduced EAE scores	Strong (ca. 75%)	5	3.5	5	7	no statistic	uni-model-dose	Dardalhon et al. (2005)	2005	J Immunol
Cd4	Cd4	Cd4	Mouse	ABH Biozzi		CR-EAE	SCH/CFA	day 25	late	I.p.	10	10	1	Reduced EAE scores, reduced relapse rate	Very strong (ca. 90%)	6	4.2	6	7	Mann-Whitney U	uni-model-dose	Pryce et al. (2005)	2005	J Neuroimmunol
IL17	Il17a	Il17a	Mouse	C57Bl/6	8-16 wks	PP-EAE	MOG/CFA	day 6, 10, 14	pre-onset	I.p.	4	12	3	Reduced EAE scores	Mild (ca. 25%)	2	2.4	12	12	Student's t test 2-sided	uni-model-dose	Hofstetter et al. (2005)	2005	Cell Immunol
NK1.1	Klrb1	Klrb1	Mouse	SJL/J	female 6-10 wks	RR-EAE	PLP/CFA	day-1+14	pre-immun	I.p.	20	40	2	Aggravated EAE scores	Worse	-2	-2.4	12	12	Student's t test	uni-model-dose	Xu et al. (2005)	2005	J Neuroimmunol
TWEAK	TNFRSF12A	Tnfrsf12a	Mouse	C57Bl/6	8 wks	PP-EAE	MOG/CFA	day 0	preventive	I.p.	8	8	1	Reduced EAE scores	Minor (ca. 10%)	1	0.6	6	6	No statistic	Early vs late	desplat-Jégo et al. (2005)	2005	Clin Immunol
TWEAK	TNFRSF12A	Tnfrsf12a	Mouse	C57Bl/6	8 wks	PP-EAE	MOG/CFA	day 9, 13, 17	pre-onset	I.p.	8	24	3	Reduced EAE scores	Moderate (ca. 40%)	3	5.4	18	18	Mann-Whitney U	Early vs late	desplat-Jégo et al. (2005)	2005	Clin Immunol
Cd28	Cd28	Cd28	Rat	Lewis	6-8 wks	Monophasic acute EAE	Adoptive transfer encephalitogenic T cells	day 3	preOnset_adopT	?	3.33	3.33	1	Reduced EAE scores	Strong (ca. 75%)	5	9	6	18	Mann-Whitney U	early vs. late	Tischner et al. (2006)	2006	Brain
Cd28	Cd28	Cd28	Rat	Lewis	6-8 wks	Monophasic acute EAE	Adoptive transfer encephalitogenic T cells	day 1	preOnset_adopT	?	3.33	3.33	1	Prevention of EAE incidence	Very strong (100%)	6	7.2	10	12	Mann-Whitney U	early vs. late	Tischner et al. (2006)	2006	Brain
Cd3	Cd3e	Cd3e	Mouse	SJL/J	female	RR-EAE	PLP/CFA	day 12-16, daily	onset	Oral	0.02	0.1	5	Reduced EAE scores	Moderate (ca. 40%)	3	2.4	8	8	no statistic	dose response	Ochi et al. (2006)	2006	Nat Med
Cd3	Cd3e	Cd3e	Mouse	SJL/J	female	RR-EAE	PLP/CFA	day -6- -2, daily	pre-immun	Oral	0.2	1	5	Reduced EAE scores	Substantial (ca. 50%)	4	3.2	8	8	no statistic	dose response	Ochi et al. (2006)	2006	Nat Med
Cd3	Cd3e	Cd3e	Mouse	SJL/J	female	RR-EAE	PLP/CFA	day 12-17, daily	onset	Oral	0.2	1.2	5	Reduced EAE scores	Substantial (ca. 50%)	4	3.2	8	8	no statistic	dose response	Ochi et al. (2006)	2006	Nat Med
Cd3	Cd3e	Cd3e	Mouse	SJL/J	female	RR-EAE	PLP/CFA	day -6- -2, daily	pre-immun	Oral	2	10	5	No difference	No effect	0	0	8	8	no statistic	dose response	Ochi et al. (2006)	2006	Nat Med
Cd3	Cd3e	Cd3e	Mouse	SJL/J	female	RR-EAE	PLP/CFA	day 12-18, daily	onset	Oral	2	14	5	No difference	No effect	0	0	8	8	no statistic	dose response	Ochi et al. (2006)	2006	Nat Med
Cd3	Cd3e	Cd3e	Mouse	SJL/J	female	RR-EAE	PLP/CFA	day -6- -2, daily	pre-immun	Oral	20	100	5	Increased EAE scores	Worse	-2	-1.6	8	8	no statistic	dose response	Ochi et al. (2006)	2006	Nat Med
IL17A	Il17a	Il17a	Mouse	SJL/J	female	RR-EAE	PLP/CFA	day 0-38, twice per week	preventive	?	20	200	10	Reduced EAE scores	Very strong (ca. 90%)	6	6	10	10	Mann-Whitney test	uni-model-dose	Uyttenhove et al. (2006)	2006	Eur J Immunol
VLA-4	Itga4, Itgb1 dimer	Itga4	Mouse	SJL/J	female 9-11 wks	RR-EAE	PLP/CFA	day 5-11, every other day	pre-onset	I.p.	8	32	4	delayed EAE onset, reduced EAE scores	Minor (ca. 10%)	1	1	10	10	ANOVA , one-way, Bonferroni post hoc	different targets, different EAE models, short vs. long	Kerfoot et al. (2006)	2006	J Immunol
VLA-4	Itga4, Itgb1 dimer	Itga4	Mouse	C57Bl/6	female 9-11 wks	PP-EAE	MOG/CFA	day 3-20, 3 times per week	preventive	I.p.	8	64	18	Reduced EAE scores	Minor (ca. 10%)	1	1.5	15	15	ANOVA , one-way, Bonferroni post hoc	different targets, different EAE models, short vs. long	Kerfoot et al. (2006)	2006	J Immunol
P-selectin	Selp	Selp	Mouse	C57Bl/6	female 9-11 wks	PP-EAE	MOG/CFA	day 3-10, 4 doses	preventive	I.p.	0.8	3.2	4	No difference	No effect	0	0	10	10	ANOVA , one-way, Bonferroni post hoc	different EAE models, short vs. long	Kerfoot et al. (2006)	2006	J Immunol
P-selectin	Selp	Selp	Mouse	SJL/J	female 9-11 wks	RR-EAE	PLP/CFA	day 5-11, every other day	pre-onset	I.p.	0.8	3.2	4	No difference	No effect	0	0	10	10	ANOVA , one-way, Bonferroni post hoc	different EAE models, short vs. long	Kerfoot et al. (2006)	2006	J Immunol
Tim-1	Havcr1	Havcr1	Mouse	SJL/J	female 8-12 wks	RR-EAE	PLP/CFA	day 0-8, every other day	preventive	I.p.	4	20	5	Aggravated EAE scores	Worse	-2	-2	0	0	Fisher’s exact test	Two mAb clones	Xiao et al. (2007)	2007	J Exp Med
Tim-1	Havcr1	Havcr1	Mouse	SJL/J	female 8-12 wks	RR-EAE	PLP/CFA	day 0-10, every other day	preventive	I.p.	4	24	6	delayed EAE onset, reduced EAE scores, reduced relapse rate	Strong (ca. 75%)	5	5	0	0	Fisher’s exact test	Two mAb clones	Xiao et al. (2007)	2007	J Exp Med
IL17a	Il17a	Il17a	Mouse	SJL/J		RR-EAE	PLP/CFA	day 0-23, twice per week	preventive	I.p.	8	48	6	delayed EAE onset, reduced EAE scores, reduced relapse rate	Strong (ca. 75%)	5	5	0	0	no statistic	different EAE models	Uyttenhove et al. (2007)	2007	Ann N Y Acad Sci
IL17a	Il17a	Il17a	Mouse	C57Bl/6		PP-EAE	MOG/CFA	day 0-23, twice per week	preventive	I.p.	8	88	6	Reduced EAE scores	Strong (ca. 75%)	5	5	0	0	no statistic	different EAE models	Uyttenhove et al. (2007)	2007	Ann N Y Acad Sci
Cd25	Il2ra	Il2ra	Mouse	C57Bl/6	8-12 wks	PP-EAE	MOG/CFA	day -3	pre-immun	I.p.	8	8	1	Aggravated EAE scores	Worse	-2	-2	10	10	Mann-Whitney U	uni-model-dose	McNeill et al. (2007)	2007	Scand J Immunol
VLA-2	Itga2	Itga2	Mouse	SJL/J	female	RR-EAE	PLP/CFA	day 0, 2, 4, 7, 9	preventive	I.p.	5	25	5	Increased EAE scores	Worse	-1	-0.7	7	7	ANOVA, one way	Early vs late, different targets	Tsunoda et al. (2007)	2007	Brain Pathol
VLA-2	Itga2	Itga2	Mouse	SJL/J	female	RR-EAE	PLP/CFA	day 10, 11, 12-20, every other day	onset	I.p.	5	35	7	Reduced EAE scores, reduced relapse rate	Moderate (ca. 40%)	3	6	18	20	ANOVA, one way	Early vs late, different targets	Tsunoda et al. (2007)	2007	Brain Pathol
VLA-2	Itga2	Itga2	Mouse	SJL/J	female	RR-EAE	PLP/CFA	day 18-36, every other day	post-onset	I.p.	5	45	9	Reduced EAE scores	Minor (ca. 10%)	1	2	18	20	ANOVA, one way	Early vs late, different targets	Tsunoda et al. (2007)	2007	Brain Pathol
VLA-4	Itga4, Itgb1 dimer	Itga4	Mouse	SJL/J	female	RR-EAE	PLP/CFA	day 10, 11, 12-20, every other day	onset	I.p.	5	35	7	Reduced EAE scores	Mild (ca. 25%)	2	4	18	20	ANOVA, one way	Early vs late, different targets	Tsunoda et al. (2007)	2007	Brain Pathol
TCRαβ	Tcr1, Tcrb	Tcr1, Tcrb	Mouse	C57Bl/6	female 8-9 wks	PP-EAE	MOG/CFA	day 0-2, daily	preventive	i.p.	4	12	3	Prevention of EAE incidence	Very strong (ca. 90%)	6	7.2	10	12	Mann-Whitney test	Early vs late	Lavasani et al. (2007)	2007	Scand J Immunol
TCRαβ	Tcr1, Tcrb	Tcr1, Tcrb	Mouse	C57Bl/6		PP-EAE	MOG/CFA	day 13-15,d aily	onset	i.p.	4	12	3	Reduced EAE scores	Substantial (ca. 50-60%)	4	4.8	10	12	Mann-Whitney test	Early vs late	Lavasani et al. (2007)	2007	Scand J Immunol
TCRVβ6	Tcrb	Tcrb	Mouse	B10.PL		RR-EAE	MBP/CFA	day 1+8	preventive	?	4	8	2	delayed EAE onset, reduced EAE scores	Strong (ca. 75%)	5	5	0	0	ANOVA	uni-model-dose	Tang et al. (2007)	2007	J Immunol
TREM-2	Trem2	Trem2	Mouse	C57Bl/6		PP-EAE	MOG/CFA	day 9	pre-onset	I.p.	20	20	1	Aggravated EAE scores	Worse	-2	-2	10	10	no statistic	different EAE models	Piccio et al. (2007)	2007	Eur J Immunol
TREM-2	Trem2	Trem2	Mouse	C57Bl/6	female 8 wks	PP-EAE	Adoptive transfer, MOG activated T cells	day 5+9	Onset-adopT	I.p.	12	24	2	Aggravated EAE scores	Worse	-2	-2	10	10	no statistic	different EAE models	Piccio et al. (2007)	2007	Eur J Immunol
Cd81	Cd81	Cd81	Mouse	SJL/J	female 8-12 wks	RR-EAE	PLP/CFA	day 5-23, every other day	pre-onset	I.p.	4	40	10	No difference	No effect	0	0	10	10	Mann-Whitney U	Two mAb clones	dijkstra et al. (2008)	2008	Neurobiol dis
Cd81	Cd81	Cd81	Mouse	SJL/J	female 8-12 wks	RR-EAE	PLP/CFA	day 5-23, every other day	pre-onset	I.p.	4	40	10	Reduced EAE scores	Substantial (ca. 50%)	4	4	10	10	Mann-Whitney U	Two mAb clones	dijkstra et al. (2008)	2008	Neurobiol dis
Cd122	IL2rb	IL2rb	Mouse	C57Bl/6	female 6-8 wks	PP-EAE	MOG/CFA	day -4, 10, 24	pre-immun	I.v.	10	30	3	No difference	No effect	0	0	8	8	no statistic	different targets	Lee et al. (2008)	2008	J Immunol
IL6	Il6	Il6	Mouse	C57Bl/6	9 wks	PP-EAE	MOG/CFA	day 0	preventive	I.p.	320	320	1	Reduced EAE incidence, reduced EAE scores	Strong (ca. 80%)	5	9.5	18	19	χ2 test and Mann-Whitney U, each time point, no correction	Early vs late, different targets	Serada et al. (2008)	2008	PNAS
IL6	Il6	Il6	Mouse	C57Bl/6	9 wks	PP-EAE	MOG/CFA	day 12	onset	I.p.	320	320	1	No difference	No effect	0	0	7	11	χ2 test and Mann-Whitney U, each time point, no correction	Early vs late, different targets	Serada et al. (2008)	2008	PNAS
NK1.1	Klrb1	Klrb1	Mouse	C57Bl/6	female 6-8 wks	PP-EAE	MOG/CFA	day -4, 10, 24	pre-immun	I.v.	10	30	3	Aggravated EAE scores	Worse	-2	-1.6	8	8	no statistic	different targets	Lee et al. (2008)	2008	J Immunol
Cd20	Ms4a1	Ms4a1	Mouse	C57Bl/6	female 6-8 wks	PP-EAE	MOG/CFA	day 7	pre-onset	I.p.	10	10	1	No difference	No effect	0	0	6	6	Student's t test	Early vs. Late	Matsushita et al. (2008)	2008	J Clin Invest
Cd20	Ms4a1	Ms4a1	Mouse	C57Bl/6	female 6-8 wks	PP-EAE	MOG/CFA	day 14	post-onset	I.p.	10	10	1	Reduced EAE scores	Substantial (ca. 50%)	4	2.4	6	6	Student's t test	Early vs. Late	Matsushita et al. (2008)	2008	J Clin Invest
Cd20	Ms4a1	Ms4a1	Mouse	C57Bl/6	female 6-8 wks	PP-EAE	MOG/CFA	day 21	late	I.p.	10	10	1	No difference	No effect	0	0	6	6	Student's t test	Early vs. Late	Matsushita et al. (2008)	2008	J Clin Invest
Cd20	Ms4a1	Ms4a1	Mouse	C57Bl/6	female 6-8 wks	PP-EAE	MOG/CFA	day -7	pre-immun	I.p.	10	10	1	Aggravated EAE scores	Worse	-2	-1.2	6	6	Student's t test	Early vs. Late	Matsushita et al. (2008)	2008	J Clin Invest
Cd3	Cd3e	Cd3e	Mouse	C57Bl/6	female 6-8 wks	PP-EAE	MOG/CFA	day 13+15	onset	I.v.	0.4	0.8	2	Reduced EAE scores	Moderate (ca. 40%)	3	3	10	10	Student's t test	uni-model-dose	Belmar et al. (2009)	2009	J Neuroimmunol
IP10	Cxcl10	Cxcl10	Mouse	SJL/J		RR-EAE	PLP/CFA	day 0	preventive	I.p.	20	20	1	No difference	No effect	0	0	10	10	ANOVA, dunnett's post hoc	uni-model-dose	Byrne et al (2009)	2009	Autoimmunity
IL12p40	Il12b	Il12b	Mouse	SJL/J	female 6-8 wks	RR-EAE	Adoptive transfer	day 18-48,daily	Late-adopT	I.p.	4	120	30	Reduced incidence of relapses, reduced EAE scores	Strong (ca. 80%)	5	3	6	6	ANOVA, one-way, dunnett's post hoc	Early vs late	Mondal et al. (2009)	2009	J Immunol
IL12p40	Il12b	Il12b	Mouse	SJL/J	female 6-8 wks	RR-EAE	Adoptive transfer	day 8-38, daily	Onset-adopT	I.p.	4	120	30	Reduced incidence of relapses, reduced EAE scores	Very strong (ca. 90%)	6	3.6	6	6	ANOVA, one-way, dunnett's post hoc	Early vs late	Mondal et al. (2009)	2009	J Immunol
TNFbeta	Tnfsf1	LTA	Mouse	MBP-TCR		PP-EAE	MBP/CFA	day 0-21, 3 times per week	preventive	I.p.	8	72	9	Reduced EAE scores	Moderate (ca. 40%)	3	3.6	12	12	ANOVA , one-way, dunnett's post hoc	uni-model-dose	Chiang et al. (2009)	2009	Nat Med
NKG2A	CD159a	Klrc1	Mouse	C57Bl/6		PP-EAE	MOG/CFA	day 13+15	post-onset	I.v.	8	16	2	Reduced EAE scores	Strong (ca. 75%)	5	3	6	6	no statistic	Early vs. late, short vs. long	Leavenworth et al. (2010)	2010	PNAS
NKG2A	CD159a	Klrc1	Mouse	C57Bl/6		PP-EAE	MOG/CFA	day 0-6, every 3rd day	preventive	I.v.	8	24	4	delayed EAE onset, reduced EAE scores	Mild (ca. 20%)	2	1.2	6	6	no statistic	Early vs. late, short vs. long	Leavenworth et al. (2010)	2010	PNAS
CXCR3	Cxcr3	Cxcr3	Rat	Lewis	male	Monophasic acute EAE	Adoptive transfer Th17	day 0-4, every other day	preOnset_adopT	I.v.	6.66667	20	3	delayed EAE onset, reduced EAE scores	Strong (ca. 75%)	5	3	4	6	Student's t test for each time point, unpaired	different EAE-models	Sporici et al. (2010)	2010	Eur J Immunol
CXCR3	Cxcr3	Cxcr3	Rat	Lewis	male	Monophasic acute EAE	Guinea pig spinal cord	day 0-8, every other day	preventive	I.v.	6.66667	33.3333	5	No difference	No effect	0	0	4	6	Student's t test for each time point, unpaired	different EAE-models	Sporici et al. (2010)	2010	Eur J Immunol
IL9	Il9	Il9	Mouse	C57Bl/6	female 8-10 wks	PP-EAE	MOG/CFA	day -1-30, every other day	preventive	I.p.	12	192	16	Reduced EAE incidence, reduced EAE scores, reduced SC demyelination	Strong (ca. 75%)	5	5	10	10	Mann-Whitney U	uni-model-dose	Li et al. (2010)	2010	J Immunol
Cd20	Ms4a1	Ms4a1	Monkey	Marmoset		Variable	Human myelin/CFA	day 21	late	I.v.	10	10	1	Reduced EAE scores, enhanced survival rate	Moderate	3	2.1	7	7	Mann-Whitney U	uni-model-dose	Kap et al. (2010)	2010	J Immunol
SEMA4d	Sema4d	Sema4d	Mouse	SJL/J	8 wks	RR-EAE	PLP/CFA	day 9, 16, 23	pre-onset	n.a.	?	15	?	Reduced EAE scores	Substantial (ca. 50-60%)	4	4.8	7	12	Student's t test, unpaired	uni-model-dose	Okuno et al. (2010)	2010	J Immunol
3G11 epitope			Mouse	C57Bl/6	female 8-10 wks	PP-EAE	MOG/CFA	day -3- -1,d aily	pre-immun	I.v.	40	120	3	delayed EAE onset, reduced EAE scores, reduced relapse rate	Strong (ca. 75%)	5	5	10	10	Mann-Whitney U	Early vs. late, short vs. Long, different EAE-models	Zhao et al. (2010)	2010	Int Immunol
3G11 epitope			Mouse	B6129SF2/J	female 8-10 wks	PP-EAE	MOG/CFA	day 22-26, daily	late	I.v.	40	200	5	Reduced EAE scores, reduced relapse rate	Substantial (ca. 50%)	4	4	10	10	Mann-Whitney U	Early vs. late, short vs. Long, different EAE-models	Zhao et al. (2010)	2010	Int Immunol
3G11 epitope			Mouse	C57Bl/6	female 8-10 wks	PP-EAE	MOG/CFA	day 11-15, daily	onset	I.v.	40	200	5	Reduced EAE scores	Mild (ca. 25%)	2	2	10	10	Mann-Whitney U	Early vs. late, short vs. Long, different EAE-models	Zhao et al. (2010)	2010	Int Immunol
3G11 epitope			Mouse	C57Bl/6	female 8-10 wks	PP-EAE	MOG/CFA	day 16-21, daily	post-onset	I.v.	40	240	6	No difference	No effect	0	0	10	10	Mann-Whitney U	Early vs. late, short vs. Long, different EAE-models	Zhao et al. (2010)	2010	Int Immunol
3G11 epitope			Mouse	C57Bl/6	female 8-10 wks	PP-EAE	MOG/CFA	day -3-21, every 3rd day	pre-immun	I.v.	40	360	8	delayed EAE onset, reduced EAE scores, reduced relapse rate	Strong (ca. 75%)	5	5	10	10	Mann-Whitney U	Early vs. late, short vs. Long, different EAE-models	Zhao et al. (2010)	2010	Int Immunol
IL17A	Il17a	Il17a	Monkey	Marmoset		Variable	MOG/CFA	day -1-113, once per week	pre-immun	S.c.	3	48	16	delayed EAE onset	Minor (ca. 10%)	1	0.8	8	8	ANOVA, one way	dose response	Kap et al. (2011)	2011	J Neuroimmune Pharmacol
IL17A	Il17a	Il17a	Monkey	Marmoset		Variable	MOG/CFA	day -1-113, once per week	pre-immun	S.c.	30	480	16	delayed EAE onset	Minor (ca. 10%)	1	0.7	7	7	ANOVA, one way	dose response	Kap et al. (2011)	2011	J Neuroimmune Pharmacol
IL7Ra	Il7ra	Il7ra	Mouse	C57Bl/6; C57Bl/6 2d2		PP-EAE	MOG/CFA	day 7-45, once per week	pre-onset		1	6	6	Reduced EAE scores	Moderate (ca. 40%)	3	3	10	10	Student's t test	dose response	Lee et al. (2011)	2011	Sci Transl Med
IL7Ra	Il7ra	Il7ra	Mouse	C57Bl/6; C57Bl/6 2d2		PP-EAE	MOG/CFA	day 14-53, twice per week	onset	?	10	120	12	Reduced EAE scores	Moderate (ca. 40%)	3	3	10	10	Student's t test	dose response	Lee et al. (2011)	2011	Sci Transl Med
VLA-4	Itga4, Itgb1 dimer	Itga4	Mouse	MBP-TCR	female 8-14	PP-EAE	MBP/CFA	day 0-21, three times per week	preventive	S.c.	8	72	9	Reduced EAE scores	Strong (ca. 75%)	5	5	10	10	ANOVA , one-way, dunnett's post hoc	different targets	Stefanich e al. (2011)	2011	Br J Pharmacol
ITGβ7	Itgb7	Itgb7	Mouse	MBP-TCR	female 8-14	PP-EAE	MBP/CFA	day 0-21, three times per week	preventive	S.c.	8	72	9	Reduced EAE scores, reduced relapse rate	Minor (ca. 10%)	1	1	10	10	ANOVA , one-way, dunnett's post hoc	different targets	Stefanich e al. (2011)	2011	Br J Pharmacol
Cd20	Ms4a1	Ms4a1	Mouse	C57Bl/6		PP-EAE	MOG/CFA	day -3 to -1 or 0	pre-immun	?	4	12	3	No difference	No effect	0	0	0	0	Mann-Whitney U	Wildtype vs humanized target	Monson et al (2011)	2011	Plos One
Cd20	Ms4a1	Ms4a1	Mouse	C57Bl6_hCd20Tg		PP-EAE	MOG/CFA	day -3 to -1 or 0	pre-immun	?	4	12	3	Reduced EAE scores, reduced EAE incidence	Very strong (ca. 95%)	6	6	0	0	Mann-Whitney U	Wildtype vs humanized target	Monson et al (2011)	2011	Plos One
TCRVβ8	Tcrb	Tcrb	Mouse	B10.PL	6-8 wks	RR-EAE	MBP/CFA	day 16-32, every other day	post-onset	I.p.	0.4	3.6	9	Reduced EAE scores	Mild (ca. 25%)	2	1	5	5	Mann-Whitney U	different EAE-models	Fernandez-Malave et al. (2011)	2011	J Neuroimmunol
TCRVβ8	Tcrb	Tcrb	Mouse	B10.PL	6-8 wks	RR-EAE	MBP/CFA	day 4-32, every other day	preventive	I.p.	0.4	6	15	Prevention of EAE incidence	Very strong (100%)	6	3	5	5	Mann-Whitney U	different EAE-models	Fernandez-Malave et al. (2011)	2011	J Neuroimmunol
TCRVβ8	Tcrb	Tcrb	Mouse	SJL/J	6-8 wks	RR-EAE	MBP/CFA	day 4-32, every other day	preventive	I.p.	0.4	6	15	Reduced EAE scores	Minor (ca. 10%)	1	0.5	5	5	Mann-Whitney U	different EAE-models	Fernandez-Malave et al. (2011)	2011	J Neuroimmunol
EMMPRIN	Cd147	Bsg	Mouse	C57Bl/6	female 6-8 wks	PP-EAE	MOG/CFA	day 8, 11, 15	pre-onset	I.p.	2	9	3	Reduced EAE scores, reduced demyelination	Strong (ca. 75%)	5	2.5	5	5	Mann-Whitney U	uni-model-dose	Agrawal et al. (2012)	2012	J Neuroinflamm
Cd47	Cd47	Cd47	Mouse	C57Bl/6		PP-EAE	MOG/CFA	day 11-30, daily	onset	I.p.	4	80	20	Increased EAE scores	Worse	-2	-2	10	10	Mann-Whitney U	uni-model-dose	Han et al (2012)	2012	J Exp Med
Cd20	Ms4a1	Ms4a1	Mouse	C57Bl/6		PP-EAE	MOG/CFA	day 10	onset	i.p.	?	8	1	Reduced EAE scores	Mild (ca. 20%)	2	2.4	6	12	Student's t test for each time point, unpaired	uni-model-dose	Barr et al. (2012)	2012	J Exp Med
Cd20	Ms4a1	Ms4a1	Mouse	B10.PL		PP-EAE	Adoptive transfer of MBP-specific encephalitogenic T-cells	day -3+12	Pre-adopT	i.p.	?	?	2	Aggravated EAE scores	Worse	-2	-0.8	3	4	Mann-Whitney test or t-test	uni-model-dose	Ray et al. (2012)	2012	J Immunol
APRIL (Cd256)	Tnfsf13	Tnfsf13b	Monkey	Marmoset	male	Variable	MOG/CFA	day 21 ongoing, once per week	late	I.v.	10	80	8	delayed EAE onset	Mild	2	1.2	6	6	Log-rank test for survival	Two mAb clones	Jagessar et al. (2012)	2012	J Neuroimmune Pharmacol
BLyS	Tnfsf13b	Tnfsf13b	Monkey	Marmoset	male	Variable	MOG/CFA	day 21-100, once per week	late	I.v.	10	120	12	delayed EAE onset	Mild	2	1.2	6	6	Mann-Whitney U	Two mAb clones	Jagessar et al (2012)	2012	J Neuroimmune Pharmacol
VEGF	Vegf	Vegf	Mouse	C57Bl/6	female 6-8 wks	PP-EAE	MOG/CFA	day 9-21, every 3 days	pre-onset	I.p.	5	25	5	Reduced EAE scores	Substantial (ca. 50%)	4	8.8	6	22	ANOVA, one-way, Bonferroni's post-hoc	uni-model-dose	McMillan et al. (2012)	2012	J Neuropathol Exp Neurol
Cd3ε	Cd3e	Cd3e	Mouse	SJL/J	female	RR-EAE	PLP/CFA	day -6- -2, daily	pre-immun	Oral	0.2	1	5	Reduced EAE scores	Moderate (ca. 40%)	3	2.1	7	7	ANOVA , one-way, Bonferroni post hoc	Two mAb clones	dépis et al. (2013)	2013	MAbs
Cd3ε	Cd3e	Cd3e	Mouse	SJL/J	female	RR-EAE	PLP/CFA	day -6- -2, daily	pre-immun	Oral	0.2	1	5	Reduced EAE scores	Substantial (ca. 50%)	4	2.8	7	7	ANOVA , one-way, Bonferroni post hoc	Two mAb clones	dépis et al. (2013)	2013	MAbs
Factor B	Cfb	Cfb	Mouse	C57Bl/6		PP-EAE	Adoptive transfer Cd4 T-cell clone directed against myelin	day 9-15, every other day	Onset-adopT	I.p.	40	120	4	Reduced EAE scores	Moderate (ca. 40%)	3	2.1	4	7	Wilcoxon signed rank test	different EAE-models	Hu et al. (2013)	2013	Mol Immunol
Factor B	Cfb	Cfb	Mouse	C57Bl/6		PP-EAE	Adoptive transfer Cd4 T-cell clone directed against myelin	day 2-8, every other day	preOnset_adopT	I.p.	40	120	4	Reduced EAE scores	Substantial (ca. 50%)	4	2.8	4	7	Wilcoxon signed rank test	different EAE-models	Hu et al. (2013)	2013	Mol Immunol
Factor B	Cfb	Cfb	Mouse	C57Bl/6		PP-EAE	MOG/CFA	day 5-11, every other day	pre-onset	I.p.	40	120	4	Reduced EAE scores	Moderate (ca. 40%)	3	3	9	10	Wilcoxon signed rank test	different EAE-models	Hu et al. (2013)	2013	Mol Immunol
HMGB1	Hmgb1	Hmgb1	Mouse	C57Bl/6		PP-EAE	MOG/CFA	day 11-15, daily	onset	I.p.	0.2	1	5	No difference	No effect	0	0	6	6	Mann-Whitney U	dose response	Uzawa et al. (2013)	2013	Clin Exp Immunol
HMGB1	Hmgb1	Hmgb1	Mouse	C57Bl/6		PP-EAE	MOG/CFA	day 11-15, daily	onset	I.p.	0.8	4	5	Reduced EAE scores	Moderate (ca. 30%)	3	1.8	6	6	Mann-Whitney U	dose response	Uzawa et al. (2013)	2013	Clin Exp Immunol
IL17A	Il17a	Il17a	Mouse	ABH Biozzi	female 6-8 wks	CR-EAE	Mouse SC/CFA	day 17-38, once per week	post-onset	S.c.	30	120	4	Reduced EAE scores	Minor (ca. 10%)	1	2.5	10	25	Mann-Whitney U	Early vs late	Mardiguian (2013)	2013	Am J Pathol
IL17A	Il17a	Il17a	Mouse	ABH Biozzi	female 6-8 wks	CR-EAE	Mouse SC/CFA	day 28-49, once per week	late	S.c.	30	120	4	Reduced EAE scores, reduced changes in motor functions	Mild (ca. 25%)	2	5	10	25	Mann-Whitney U	Early vs late	Mardiguian (2013)	2013	Am J Pathol
IL17A	Il17a	Il17a	Mouse	ABH Biozzi	female 6-8 wks	CR-EAE	Mouse SC/CFA	day 1-47, once per week	preventive	S.c.	30	240	8	Reduced EAE scores, reduced changes in motor functions	Strong (ca. 75%)	5	5	10	10	Mann-Whitney U	Early vs late	Mardiguian (2013)	2013	Am J Pathol
VLA-4	Itga4, Itgb1 dimer	Itga4	Mouse	C57Bl/6	male and female 8-12 wks	PP-EAE	MOG/CFA	day 0, every 4 d, for 28d	preventive	I.p.	4	32	8	Reduced EAE scores	Strong (ca. 75%)	5	4.5	8	9	Student's t test for cumulative score	uni-model-dose	Wright et al. (2013)	2013	Plos One
Protein C	Proc	Proc	Mouse	C57Bl/6; C57Bl/6 2d2		PP-EAE	MOG/CFA	day 0-6, every other day	preventive	I.p.	1	4	4	Reduced EAE incidence, delayed EAE onset, reduced EAE scores	Substantial (ca. 50-60%)	4	3.6	9	9	Mann-Whitney U	uni-model-dose	Alabanza et al. (2013)	2013	J Immunol
IL6	Il6	Il6	Mouse	C57Bl/6	female 6-8 wks	PP-EAE	MOG/CFA	day 17-30, daily	post-onset	p.o.	0.04	0.56	14	Reduced EAE scores	Mild (ca. 25%)	2	4.8	24	24	ANOVA	dose response	Brod et al. (2014)	2014	Cytokine
IL6	Il6	Il6	Mouse	C57Bl/6	female 6-8 wks	PP-EAE	MOG/CFA	day 17-30, daily	post-onset	p.o.	0.4	5.6	14	Reduced EAE scores	Substantial (ca. 50%)	4	9.6	24	24	ANOVA	dose response	Brod et al. (2014)	2014	Cytokine
VLA-4	Itga4, Itgb1 dimer	Itga4	Mouse	C57Bl/6	7 wks	PP-EAE	MOG/CFA	day 7-17, every other day	pre-onset	I.p.	5	30	6	Reduced EAE scores	Substantial (ca. 50%)	4	4	10	10	Mann-Whitney U	Early vs late	Mindur et al. (2014)	2014	Plos One
VLA-4	Itga4, Itgb1 dimer	Itga4	Mouse	C57Bl/6	7 wks	PP-EAE	MOG/CFA	day 13-40, every other day	onset	I.p.	5	70	14	Reduced EAE scores	Moderate (ca. 40%)	3	3	10	10	Mann-Whitney U	Early vs late	Mindur et al. (2014)	2014	Plos One
Sema4d	Sema4d	Sema4d	Rat	DA		RR-EAE	MOG/CFA	day 3, 7, 10, 14, 21 and 28	preventive	I.v.	15	90	6	Reduced EAE scores, reduced demyelination	Moderate (ca. 40%)	3	9	30	30	ANOVA, 2-way	different EAE models	Smith et a. (2014)	2014	Neurobiol dis
Sema4d	Sema4d	Sema4d	Mouse	SJL/J	female 6-8 wks	RR-EAE	Adoptive transfer Cd4+ T-cells	day 0, then twice weekly	preOnset_adopT	I.p.	24	192	8	Reduced EAE scores, reduced demyelination	Substantial (ca. 50%)	4	4.8	12	12	ANOVA, 2-way	different EAE models	Smith et a. (2014)	2014	Neurobiol dis
Sema4d	Sema4d	Sema4d	Mouse	C57Bl/6	male and female 8-12 wks	PP-EAE	MOG/CFA	day 7, then twice weekly	pre-onset	I.p.	24	216	13	Reduced EAE scores, reduced demyelination	Substantial (ca. 50%)	4	5.6	14	14	ANOVA, 2-way	different EAE models	Smith et a. (2014)	2014	Neurobiol dis
Sema4d	Sema4d	Sema4d	Mouse	SJL/J	female 6-8 wks	RR-EAE	PLP/CFA	day 7, then twice weekly	pre-onset	I.p.	24	312	13	Reduced EAE scores, reduced demyelination	Substantial (ca. 50%)	4	7.2	18	18	ANOVA, 2-way	different EAE models	Smith et a. (2014)	2014	Neurobiol dis
TCRg1	Tcrg	Tcrg	Mouse	C57Bl/6		PP-EAE	MOG/CFA	day 0, 2	preventive	i.p.	8	16	2	Reduced EAE scores	Very strong (ca. 95%)	6	3	5	5	Student's t test	different targets, different EAE models	Blink et al. (2014)	2014	Cell Immunol
TCRg4	Tcrg	Tcrg	Mouse	C57Bl/6	female 6-8 wks	PP-EAE	MOG/CFA	day 0, 2	preventive	i.p.	8	16	2	Aggravated EAE scores	Worse	-2	-1	5	5	Student's t test	different targets, different EAE models	Blink et al. (2014)	2014	Cell Immunol
TCRg1	Tcrg	Tcrg	Mouse	SJL/J	female 6-8 wks	RR-EAE	PLP/CFA	day 0, 2	preventive	i.p.	8	16	2	Reduced EAE scores	Minor (ca. 10%)	1	0.5	5	5	Student's t test	different targets, different EAE models	Blink et al. (2014)	2014	Cell Immunol
TCRg4	Tcrg	Tcrg	Mouse	SJL/J	female 6-8 wks	RR-EAE	PLP/CFA	day 0, 2	preventive	i.p.	8	16	2	Aggravated EAE scores	Worse	-2	-1	5	5	Student's t test	different targets, different EAE models	Blink et al. (2014)	2014	Cell Immunol
LAP	Tgfb1	Tgfb1	Mouse	C57Bl/6		PP-EAE	MOG/CFA	day -5 to -1, daily	pre-immun	I.p.	2	10	5	Increased EAE scores	Worse	-2	-2	0	0	ANOVA , one-way, Tukey's post hoc	uni-model-dose	da Cunha et al (2014)	2014	Intern Immunol
Cd52	Cd52	Cd52	Mouse	C57Bl6/ByJ		PP-EAE	MOG/CFA	day 12-16, daily	onset	S.c.	10	50	5	Reduced EAE scores, reduced SC demyelination	Strong (ca. 75%)	5	3.5	6	7	no statistic	different EAE models	Turner et al. (2015)	2015	J Neuroimmunol
Cd52	Cd52	Cd52	Mouse	SJL/ByJ		PP-EAE	MOG/CFA	day 12-16, daily	onset	S.c.	10	50	5	Reduced EAE scores, reduced SC demyelination	Strong (ca. 75%)	5	3.5	6	7	no statistic	different EAE models	Turner et al. (2015)	2015	J Neuroimmunol
CXCL3	Cxcl3	Cxcl3	Mouse	SJL/J	female 8-10 wks	RR-EAE	PLP/CFA	day 7-63, once per week	pre-onset	I.p.	30	240	8	Reduced EAE scores	Moderate (ca. 30-40%)	3	3	10	10	Student's t test, unpaired	different EAE-models	Klimatcheva et al. (2015)	2015	BMC Immunol
CXCL3	Cxcl3	Cxcl3	Mouse	SJL/J	female 8-10 wks	RR-EAE	Adoptive transfer Th17	day 0-28, twice a week	preOnset_adopT	I.p.	30	270	9	Reduced EAE scores	Moderate (ca. 30-40%)	3	3	10	10	Student's t test, unpaired	different EAE-models	Klimatcheva et al. (2015)	2015	BMC Immunol
IL17	Il17a	Il17a	Mouse	C57Bl/6		PP-EAE	MOG/CFA	day 5-30, every other day	pre-onset	I.p.	4	52	13	Reduced EAE incidence, reduced EAE scores, reduced optic neuritis	Mild (ca. 25%)	2	3.2	8	16	ANOVA, 2-way, Bonferroni's post-hoc	uni-model-dose	Knier et al. (2015)	2015	J Autoimmun
IL17	Il17a	Il17a	Mouse	C57Bl/6	female 6-8 wks	PP-EAE	MOG/CFA	day -1-19, every other day	pre-immun	S.c.	25	250	10	Reduced EAE scores	Mild (ca. 25%)	2	2.8	14	14	ANOVA , one-way, Bonferroni post hoc	different targets	Mangan et al. (2015)	2015	J Pharmacol Exp Ther
IL23	Il23	Il23	Mouse	C57Bl/6	female 6-8 wks	PP-EAE	MOG/CFA	day -1-19, every other day	pre-immun	S.c.	25	250	10	Reduced EAE scores	Minor (ca. 10%)	1	1.4	14	14	ANOVA , one-way, Bonferroni post hoc	different targets	Mangan et al. (2015)	2015	J Pharmacol Exp Ther
VLA-4	Itga4, Itgb1 dimer	Itga4	Mouse	OSE		spontaneous	none	day 13 after disease start to 29, every other day	onset	I.p.	3	27	9	No difference	No effect	0	0	7	9	no statistic	Early vs late, short vs long	Häusler et al. (2015)	2015	Neuropathol Appl Neurobiol
VLA-4	Itga4, Itgb1 dimer	Itga4	Mouse	OSE		spontaneous	none	day of disease start (1)-4, daily	onset	I.p.	8	32	4	Reduced EAE scores, reduced demyelination	Mild (ca. 25%)	2	2.6	13	13	Mann-Whitney U	Early vs late, short vs long	Häusler et al. (2015)	2015	Neuropathol Appl Neurobiol
VLA-4	Itga4, Itgb1 dimer	Itga4	Mouse	OSE		spontaneous	none	day of disease start (1)-29, every other day	onset	I.p.	3	45	15	Reduced EAE scores, reduced demyelination	Moderate (ca. 40%)	3	3.9	12	13	Mann-Whitney U	Early vs late, short vs long	Häusler et al. (2015)	2015	Neuropathol Appl Neurobiol
LINGO1	Lingo1	Lingo1	Mouse	C57Bl/6	male 10 wks	PP-EAE	MOG/CFA	day 14-58, once every six days	onset	I.p.	10	80	8	Reduced EAE scores, restored memory deficits	Strong (ca. 75%)	5	5	0	0	ANOVA, dunnett's post hoc	uni-model-dose	Sun et al. (2015)	2015	Sci Rep
MSRV-Env			Mouse	C57Bl/6	female 6-8 wks	PP-EAE	MOG/CFI/MSRV-Env	day 24	late	?	4	4	1	No difference	No effect	0	0	4	4	No statistic	uni-model-dose	Curtin et al. (2015)	2015	MAbs
Cd19	Cd19	Cd19	Mouse	hCd19Tg	male 6-8 wks	PP-EAE	MOG/CFA	day 7	pre-onset	I.p.	10	10	1	Reduced EAE scores, reduced changes in grip strength of the hindlimbs	Strong (ca. 75%)	5	6	9	12	Student's t test	different targets	Chen et al. (2016)	2016	J Immunol
Cd48	Cd48	Cd48	Mouse	C57Bl/6	male and female 8-12 wks	PP-EAE	MOG/CFA	day 13, 16, 19	onset	I.p.	8	24	3	Reduced EAE scores	Mild (ca- 30%)	2	1.2	4	6	Mann-Whitney U	Early vs late	McArdel et al. (2016)	2016	J Immunol
Cd48	Cd48	Cd48	Mouse	C57Bl/6	male and female 8-12 wks	PP-EAE	MOG/CFA	day 6, 9, 12	pre-onset	I.p.	8	24	3	Reduced EAE scores	Strong (ca. 75%)	5	3	4	6	Mann-Whitney U	Early vs late	McArdel et al. (2016)	2016	J Immunol
Cd99	Cd99	Cd99	Mouse	SJL/J	female 6-8 wks	RR-EAE	PLP/CFA	day 12-34, every other day	onset	I.p.	4	48	12	Reduced EAE scores	Mild (ca. 25%)	2	2	0	0	Mann-Whitney U	Early vs late	Winger et al. (2016)	2016	J Immunol
Cd99	Cd99	Cd99	Mouse	SJL/J	female 6-8 wks	RR-EAE	PLP/CFA	day 20-33, daily	late	I.p.	4	56	7	Reduced EAE scores, reduced incidence of relapses	Moderate (ca. 40%)	3	3.6	12	12	Mann-Whitney U	Early vs late	Winger et al. (2016)	2016	J Immunol
CXCR7	Cxcr7	Cxcr7	Mouse	C57Bl/6	female 8-10 wks	PP-EAE	MOG/CFA	day 0-25, daily	preventive	I.p.	0.04	1	25	delayed EAE onset, reduced EAE scores	Mild (ca. 25%)	2	4.8	24	24	Mann-Whitney U	dose response	Bao et al. (2016)	2016	Biochem Biophys Res Commun
CXCR7	Cxcr7	Cxcr7	Mouse	C57Bl/6	female 8-10 wks	PP-EAE	MOG/CFA	day 0-25, daily	preventive	I.p.	0.4	10	25	delayed EAE onset, reduced EAE scores	Moderate (ca. 40-50%)	3	7.2	24	24	Mann-Whitney U	dose response	Bao et al. (2016)	2016	Biochem Biophys Res Commun
NMdAR	Grin1	Grin1	Mouse	C57Bl/6	male 12 wks	PP-EAE	MOG/CFA	day 6	pre-onset	I.v.	6.4	6.4	1	Reduced EAE scores, reduced SC demyelination	Moderate (ca. 40%)	3	7.2	24	24	Kuskall-Wallis and Mann-Whitney test, Wilcoxon Signed Rang test	dose response	Macrez et al. (2016)	2016	Brain
NMdAR	Grin1	Grin1	Mouse	C57Bl/6	male 12 wks	PP-EAE	MOG/CFA	day 3, 10, 15	preventive	I.v.	6.4	19.2	3	Reduced EAE scores, reduced SC demyelination	Substantial (ca. 50%)	4	9.6	24	24	Kuskall-Wallis and Mann-Whitney test, Wilcoxon Signed Rang test	dose response	Macrez et al. (2016)	2016	Brain
IL12/23	Il12/Il23	Il12/Il23	Mouse	C57Bl/6	female 6-8 wks	PP-EAE	MOG/CFA	day 17-36, daily	post-onset	Oral	0.04	0.8	20	Reduced EAE scores	Strong (ca. 75%)	5	20	40	40	ANOVA	dose response	Brod et al. (2016)	2016	J Neurol Sci
IL12/23	Il12/Il23	Il12/Il23	Mouse	C57Bl/6	female 6-8 wks	PP-EAE	MOG/CFA	day 17-36, daily	post-onset	Oral	0.4	8	20	Reduced EAE scores	Moderate (ca. 40%)	3	12	40	40	ANOVA	dose response	Brod et al. (2016)	2016	J Neurol Sci
IL3	Il3	Il3	Mouse	C57Bl/6N	female 8-12 wks	PP-EAE	MOG/CFA	day 0-19, daily	preventive	I.p.	2	112	20	Reduced EAE scores	Moderate (ca. 40%)	3	4.5	14	15	Student's t test, uncorrected	uni-model-dose	Renner et al. (2016)	2016	JCI Insight
Cd20	Ms4a1	Ms4a1	Mouse	hCd19Tg	male 6-8 wks	PP-EAE	MOG/CFA	day 7	pre-onset	I.p.	10	10	1	Reduced EAE scores	Moderate (ca. 40%)	3	3.6	10	12	Student's t test	different targets	Chen et al. (2016)	2016	J Immunol
hCCR6	Ccr6	Ccr6	Mouse	hCCR6-Tg/mCCR6-/-	female 8-12 wks	PP-EAE	MOG/CFA	day 8+13	pre-onset	I.p.	2	4	2	Prevention of EAE incidence, delayed EAE onset, reduced EAE scores	Substantial (ca. 50%)	4	8	20	20	Kruskal-Wallis	Early vs late	Robert et al. (2017)	2017	JCI Insight
hCCR6	Ccr6	Ccr6	Mouse	hCCR6-Tg/mCCR6-/-	female 8-12 wks	PP-EAE	MOG/CFA	day 13+16	post-onset	I.p.	5	10	2	Reduced EAE scores	Moderate (ca. 40%)	3	3.6	12	12	Kruskal-Wallis	Early vs late	Robert et al. (2017)	2017	JCI Insight
CD4	Cd4	Cd4	Mouse	ABH Biozzi	6-8 wks	CR-EAE	Mouse SC/CFA	day 28	late	I.p.	10	10	1	Reduced EAE scores, reduces relapse rate	Very strong (ca. 90%)	6	6	8	10	Non parametric statistics	different targets	von Kutzleben (2017)	2017	Immunology
CD52	Cd52	Cd52	Mouse	C57Bl/6	female 6 wks	PP-EAE	MOG/CFA	day 10-14	onset	I.p.	10	50	5	Reduced EAE scores	Strong (ca. 75%)	5	9	11	18	Student's t test	uni-model-dose	Pant et al. (2017)	2017	J Neuroimmunol
CD52	Cd52	Cd52	Mouse	ABH Biozzi	6-8 wks	CR-EAE	Mouse SC/CFA	day 28-32, every other day	late	S.c.	10	50	5	Reduced EAE scores, reduces relapse rate	Substantial (ca. 50%)	4	3.2	8	8	Non parametric statistics	different targets	von Kutzleben (2017)	2017	Immunology
CD6	Cd6	Cd6	Mouse	DBA-1	female 8-10 wks	PP-EAE	MOG/CFA	day 7	pre-onset	I.p.	16	16	1	Reduced EAE scores	Strong (ca. 75%)	5	7	14	14	ANOVA	uni-model-dose	Li et al. (2017)	2017	Proc Natl Acad Sci USA
IL17	Il17a	Il17a	Mouse	hCCR6-Tg/mCCR6-/-	female 8-12 wks	PP-EAE	MOG/CFA	day 8+13	pre-onset	I.p.	2	4	2	Prevention of EAE incidence, delayed EAE onset, reduced EAE scores	Strong (ca. 75%)	5	5.5	11	11	Kruskal-Wallis	Early vs late	Robert et al. (2017)	2017	JCI Insight
IL17	Il17a	Il17a	Mouse	hCCR6-Tg/mCCR6-/-	female 8-12 wks	PP-EAE	MOG/CFA	day 13+16	post-onset	I.p.	5	10	2	Reduced EAE scores	Substantial (ca. 50%)	4	3.2	8	8	Kruskal-Wallis	Early vs late	Robert et al. (2017)	2017	JCI Insight
Cd20	Ms4a1	Ms4a1	Mouse	ABH Biozzi	female 6-8 wks	CR-EAE	Mouse SC/CFA	day -7	pre-immun	I.v.	10	10	1	Aggravated EAE scores	Worse	-2	-1.8	7	9	Mann-Whitney U	Early vs late, short vs. Long	Sefia et al. (2017)	2017	Mult Scler Relat Disord
Cd20	Ms4a1	Ms4a1	Mouse	ABH Biozzi	female 6-8 wks	CR-EAE	Mouse SC/CFA	day 28 or day 21	late	I.v.	10	10	1	No difference	No effect	0	0	5	9	Mann-Whitney U	Early vs late, short vs. Long	Sefia et al. (2017)	2017	Mult Scler Relat Disord
Cd20	Ms4a1	Ms4a1	Mouse	ABH Biozzi	female 6-8 wks	CR-EAE	Mouse SC/CFA	day 8+28	pre-onset	I.v.	10	20	2	No difference	No effect	0	0	6	9	Mann-Whitney U	Early vs late, short vs. Long	Sefia et al. (2017)	2017	Mult Scler Relat Disord

## Sheet: Abbreviations
Abbreviation	Full name
APC	Antigen presenting cell
APRIL	A proliferation inducing ligand
ASF	Antisecretory factor
BBB	Blood brain barrier
Blys	B lymphocyte stimulator
CD	Cluster of differentiation
CFA	Complete freund's adjuvant
CNS	Central nervous system
CR	Complement receptor
CR-EAE	Chronic relapsing EAE
DC	Dendritic cell
EAE	Experimental autoimmune encephalomyelitis
EMMPRIN	Extracellular matrix metalloproteinase inducer
GITR	Glucocorticoid-induced TNF-receptor
I.c.	Intracerebroventricular
I.p.	Intraperitoneal
I.v.	Intravenous
IFN	Interferone
IL	Interleukin
IP	IFN-inducible protein
LAP	Latency-associated peptide
LINGO	Rich repeat and Ig domain containing NOGO receptor interacting protein
LSD	Fisher's least significant difference
MAdCAM	Mucosal addressin cell adhesion molecule-1
MBP	Myelin basic protein
MOG	Myelin oligodendrocyte glycoprotein
NK cell	Natural killer cell
NMDAR	N-methyl-D-aspartate receptor
OSE mice	double transgenic mice that have B cells and Igs recognizing myelin oligodendrocyte glycoprotein (MOG) and T cells recognizing MOG peptide 35–55
PLP	Proteolipid protein
PP-EAE	Primary progressive EAE
PSOX	Phosphatidyserine and oxidized lipoprotein
RR-EAE	Relapsing-remitting EAE
S.c.	Subcutaneous
SC	Spinal cord
SEMA	Semaphorin
SR	Scavenger receptor
TCR	T cell receptor
Th cells	T helper cell
Tim	T cell immunoglobulin mucin
TNF	Tumor necrosis factor
TREM	Triggering receptor expressed on myeloid cells
TWEAK	TNF-like weak inducer of apoptosis
VEGF	Vascular endothelial growth factor
VLA-4	Integrin alpha4beta1, Very late antigen-4
Vtcn1	V-set domain containing T cell activation inhibitor 1
Wks	Weeks
